# Supplementary material
Source: MDPI journal article supplement (https://www.mdpi.com/2073-4441/13/17/2412)
Supplement: s1 [file s1]

## Supplementary data

### **Enhanced single and simultaneous As(III) adsorption in Pearl River Delta water by hexylamine functionalized vermiculite**

Zubair Ahmed<sup>a,f</sup>, Pingxiao Wu<sup>a, b, c, d, e, \*</sup>,

Yijing Xu<sup>a</sup>, Hareef Ahmed Keerio<sup>g</sup>, Jiayan Wu<sup>a</sup>, Quanyun Ye<sup>a</sup>, Wenchao Niu<sup>a</sup>, Meiqing Chen<sup>a</sup>, Zhi Dang<sup>a</sup>.

<sup>a</sup> School of Environment and Energy, South China University of Technology, Guangzhou 510006, P.R. China.

<sup>b</sup> The Key Lab of Pollution Control and Ecosystem Restoration in Industry Clusters, Ministry of Education, Guangzhou 510006, PR China.

<sup>c</sup> Guangdong Provincial Key Laboratory of Solid Wastes Pollution Control and Recycling, Guangzhou 510006, PR China.

<sup>d</sup> Guangdong Engineering and Technology Research Center for Environmental Nanomaterials, Guangzhou 510006, PR China

<sup>e</sup> Guangdong Provincial Engineering and Technology Research Center for Environmental Risk Prevention and Emergency Disposal, Guangzhou, 510006, PR China.

<sup>f</sup> Department of Energy and Environment Engineering, Dawood University of Engineering and Technology, Karachi 74800, Pakistan.

<sup>g</sup> Department of Civil and Environmental Engineering, Hanyang University, Seoul, South Korea.

\*Corresponding author: Pingxiao Wu

Tel: +86-20-39380538

Fax: +86-20-39383725

email: pppxwu@scut.edu.cn

## 1 Experimental section

### 1.1 Potentiometric titration experiment

The experimental procedure for potentiometric and conductometric titration was the same, as used in our previous study(Ahmed et al., 2020), in detail: A standard thermostatic bath was used to maintain temperature, inside which a specially designed glass bottle was placed; this bottle could accommodate measuring electrodes of conductivity and pH. A mechanical stirrer continuously stirred the suspensions for homogenization of the sample. A micropipette ( $\Delta V=0.5\%$  mL) was used to add the titrant volume, whereas pH and conductivity of the suspension were measured with a pH-meter a conductometer (Cond 730), respectively.

### 1.2 Determination of point of zero charge

The point of zero charge (pzc) of materials was calculated by the Roberts-Mular potentiometric titration method, which works on the ion exchange principle, by measuring sample pH at different ionic strength solutions(Mular and Roberts, 1966). A solution of 0.001 M NaCl was prepared using Milli-Q ultrapure water, and three sets of ten bottles were prepared, each containing 50 mL NaCl solution. Each set of ten bottles were adjusted in a range of 2~11 pH containing 1.00 g. of adsorbent (VER or HEX-VER). The ionic strength of each solution bottle was then raised to 0.01 and 0.1 mol.dm<sup>-3</sup> by adding an appropriate amount of NaCl dry crystals. The bottles were shaken at 25 °C for 24 h, and after equilibrium, the final pH of the solutions was measured. The difference of pH ( $\Delta pH$ ) in initial pH ( $pH_i$ ) and final pH ( $pH_f$ ) was calculated by (Eq. (S1)) and was plotted against final pH. The pH value where  $\Delta pH$  was zero indicated the point of zero charge (pzc) for each material.

$$\Delta pH = pH_i - pH_f \quad (S1)$$

### 1.3 Determination of surface charge density

Surface charge density was determined by acid-base potentiometric titration; the same procedure was used, as in our previous study (Ahmed et al., 2020), in detail: A blank solution (with a fixed concentration of electrolyte) or aqueous (VER or HEX-VER) suspension of 100 mL was poured in a glass bottle, which was thermostated at  $25 \pm 1$  °C. A mixture of a fixed concentration of the blank solution of a given electrolyte and 0.5 ml of HCl (0.5 M) was mixed to 2 g.L<sup>-1</sup> of aqueous (VER or HEX-VER) suspension. The titrant solution (0.2 M NaOH) was added with  $50 \pm 0.005$  µL increments; results were measured after pH and conductivity of the solution became constants. The titration was stopped around pH 10. Surface charge density  $\sigma H$  was calculated as; the difference between the total amount of H<sup>+</sup> or OH<sup>-</sup> added to the suspension by (Eq. (S4)) and that required to bring a blank solution with the same NaCl concentration at the same pH (Msadok et al., 2019; Schroth and Sposito, 1997).

$$pH = -\log[H^+] \quad (S2)$$

$$[H^+] = 10^{-pH} \quad (S3)$$

$$\sigma H = \frac{V}{m} S \left\{ ([H^+]_b - [H^+]_s) - \left( \frac{k_w}{[H^+]_b} - \frac{k_w}{[H^+]_s} \right) \right\} \quad (S4)$$

where,  $\sigma H$  is surface charge density (mol.m<sup>2</sup>); V is the volume of the electrolyte solution (mL) equilibrated with the material (VER or HEX-VER); [H<sup>+</sup>] is the solution proton concentration; K<sub>w</sub> is the dissociation product of water; subscripts “s” and “b” refer to sample and blank solution; m is the mass of sample (g), and S is the specific surface area (m<sup>2</sup>.g<sup>-1</sup>) calculated by Brunauer-Emmett-Teller (BET) analysis, as in (Table 1).

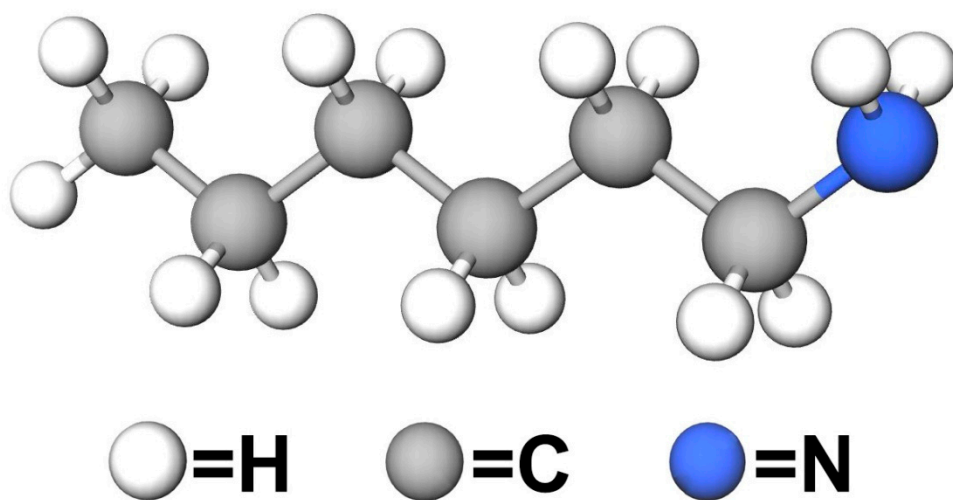

**Figure S1.** The molecular structure of hexylamine [ $\text{CH}_3(\text{CH}_2)_5\text{NH}_2$ ]

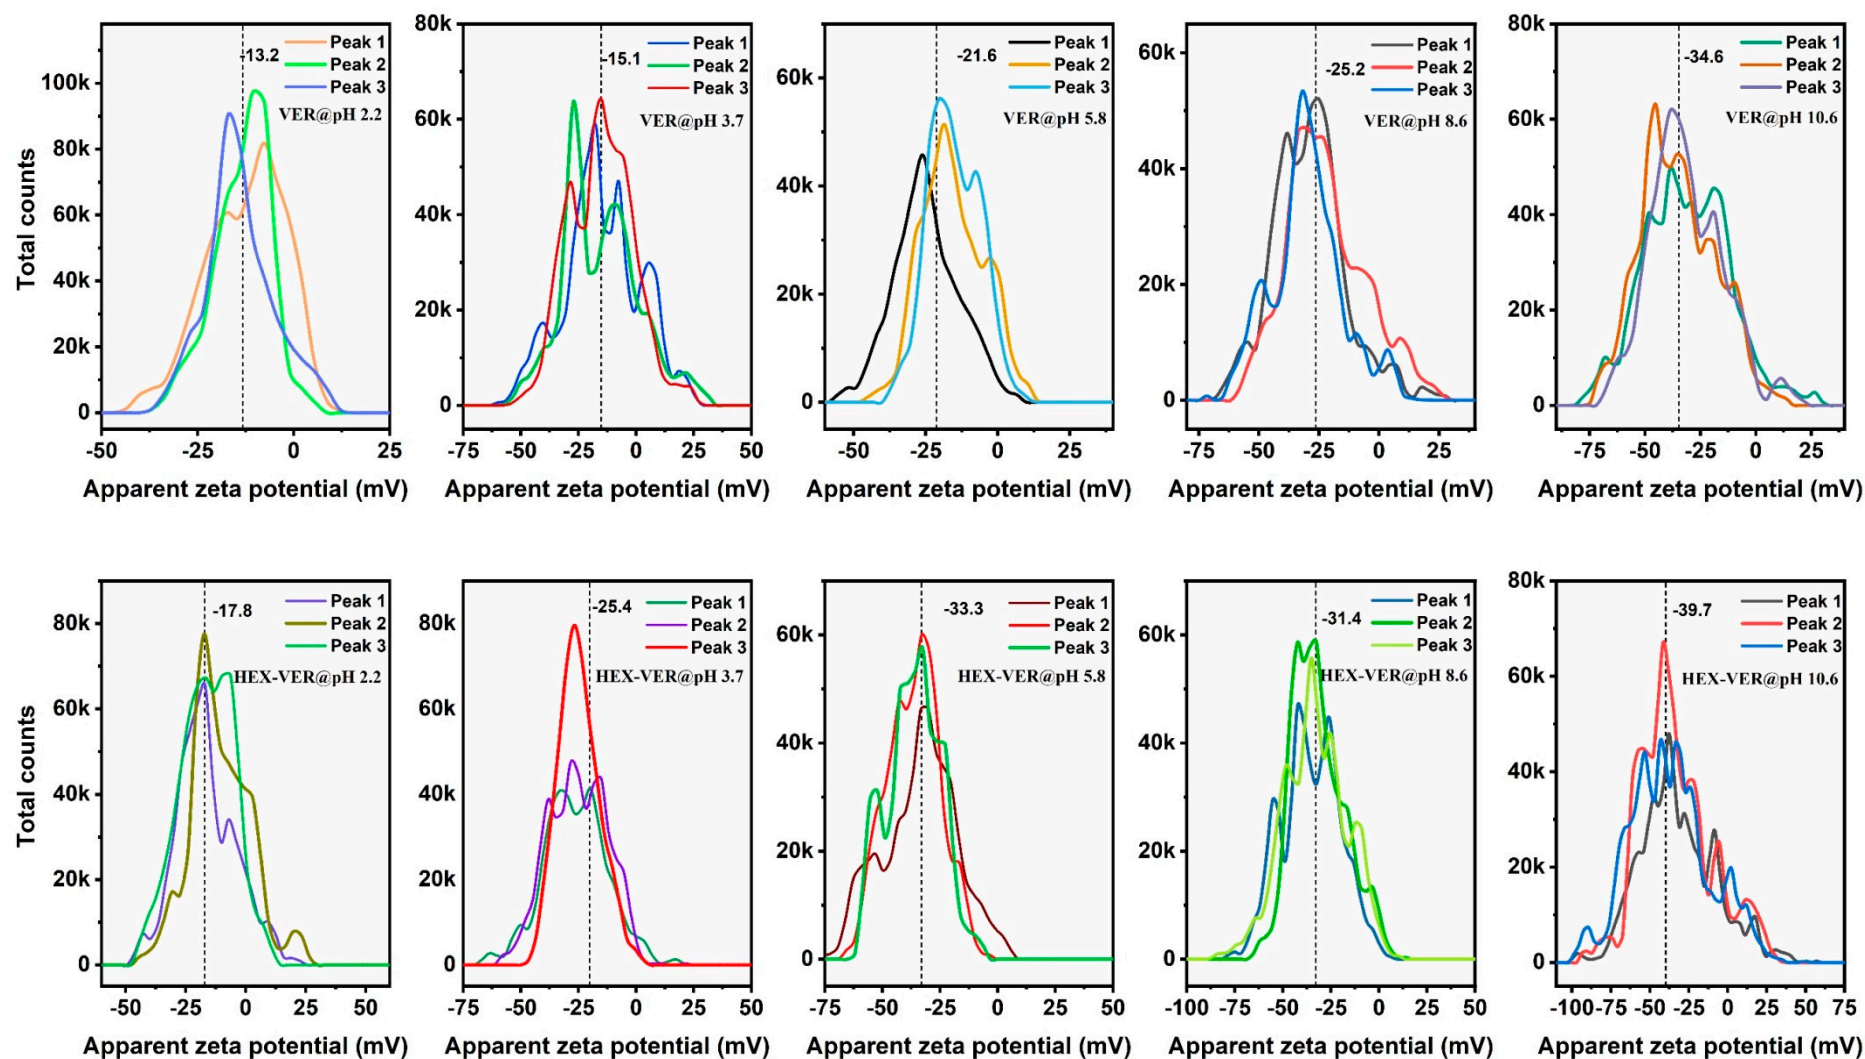

**Figure S2.** Detailed zeta potential results of VER and HEX-VER in the pH range (2~11).

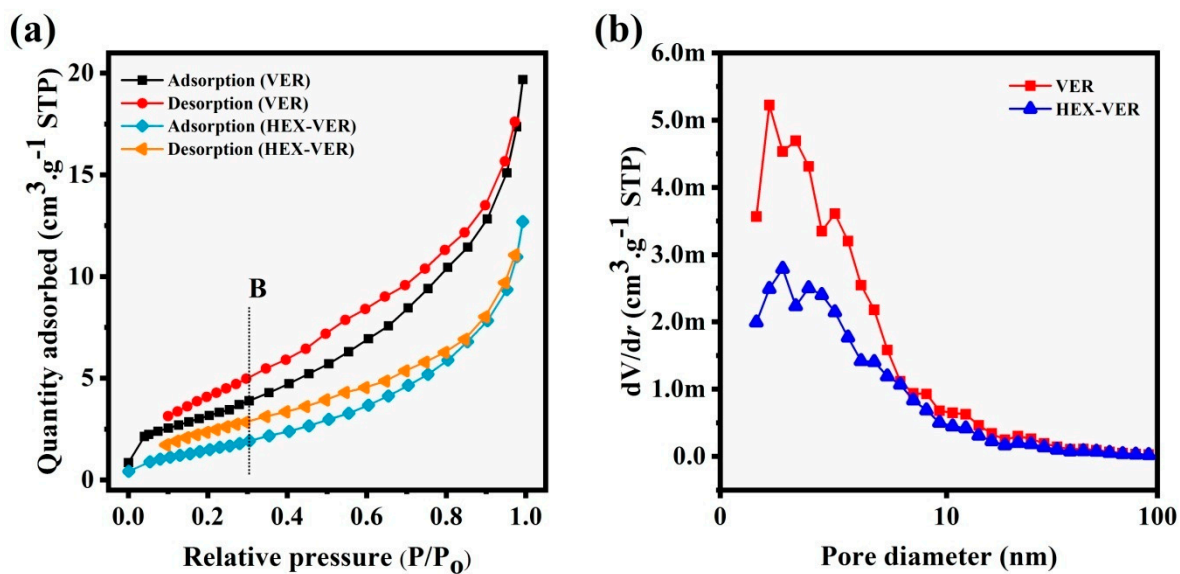

**Figure S3.** Nitrogen adsorption-desorption curve (a) and pore diameter distribution (b) for VER and HEX-VER.

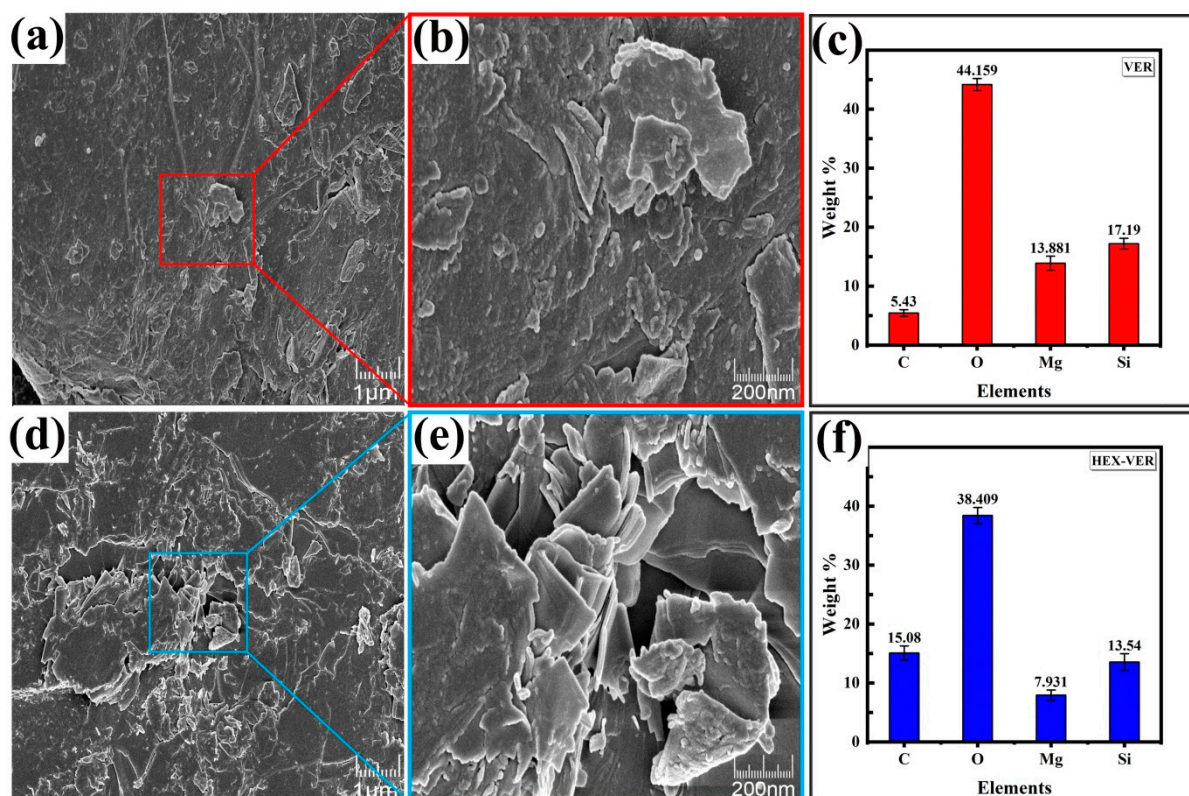

**Figure S4.** Surface morphology (SEM images at 1  $\mu\text{m}$ ) of VER(a) and HEX-VER(d); zoomed SEM images (200 nm) of VER(b) and HEX-VER(e); and presence of major elements(Wt. %) in VER(c) and HEX-VER(f), respectively.



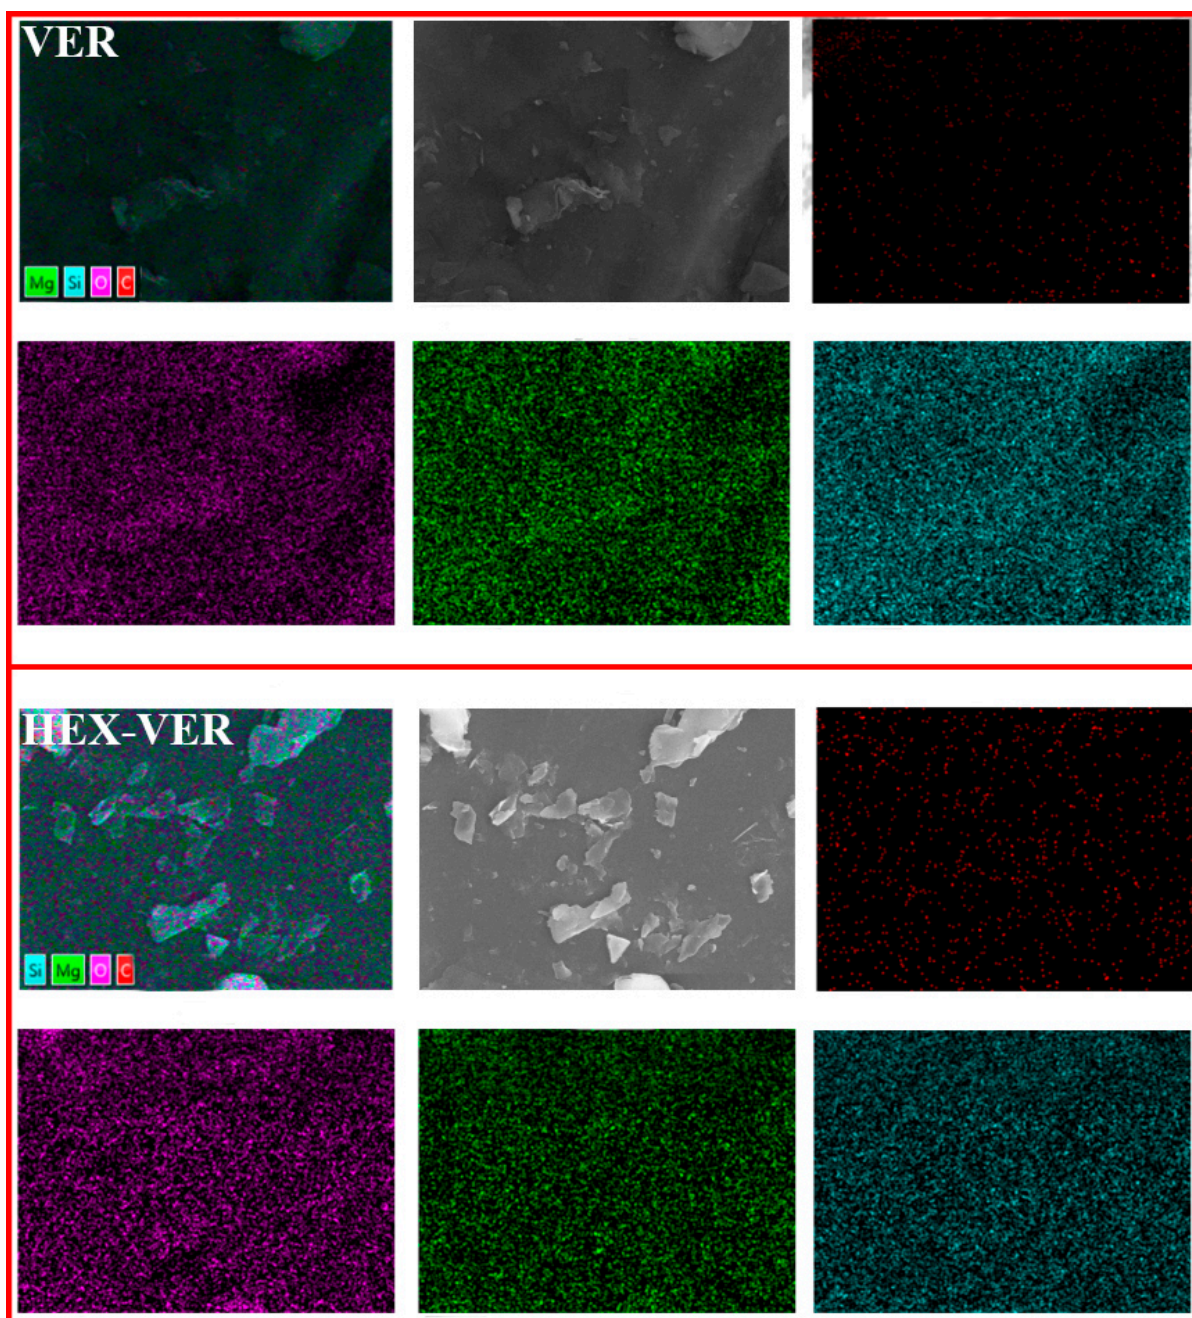

**Figure S5** Surface chemical composition of VER and HEX-VER by mapping.



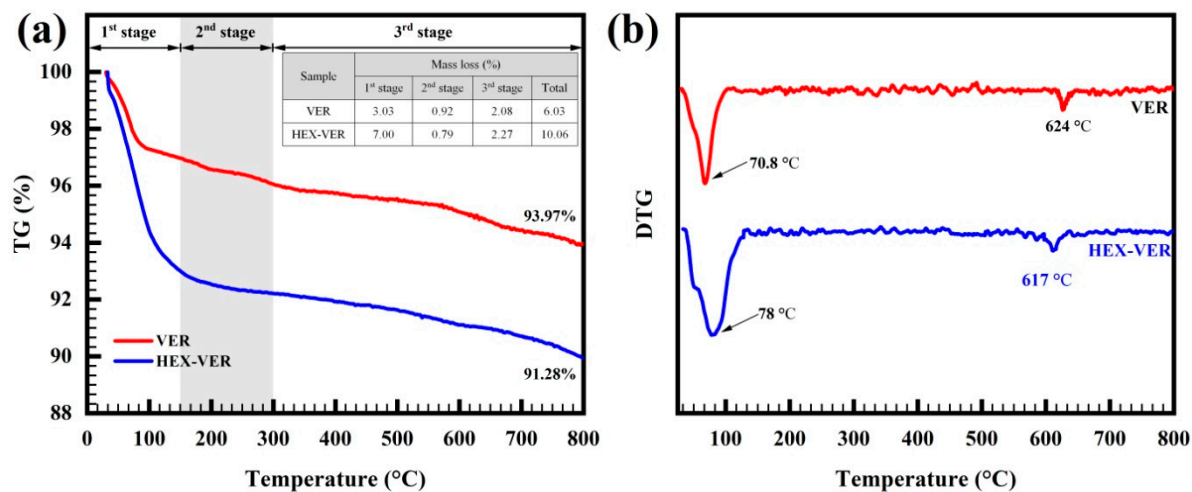

**Figure S6.** TGA(a) and DTG(b) of VER and HEX-VER.

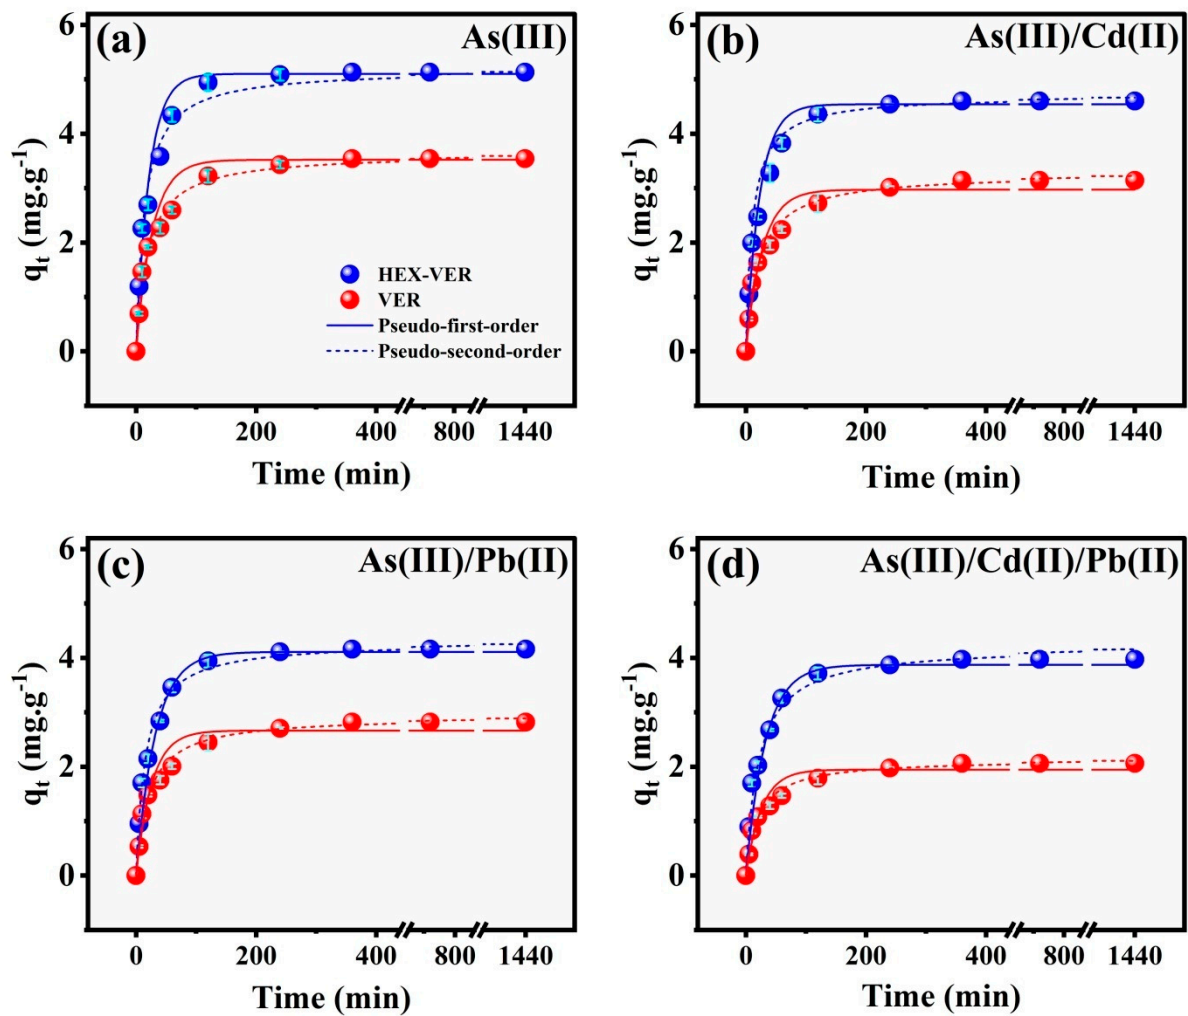

**Figure S7.** Effect of contact time and kinetic study of As(III) singular (a), in the presence of Cd(II)(b), in the presence of Pb(II)(c), and in the presence of Cd(II)/Pb(II)(d) on VER and HEX-VER; (As(III) at  $C_i=30 \text{ mg.L}^{-1}$ ; contact time: 1440 min; temperature: 30 °C; pH: 5; adsorbent dosage:  $1.0 \text{ g.L}^{-1}$ )

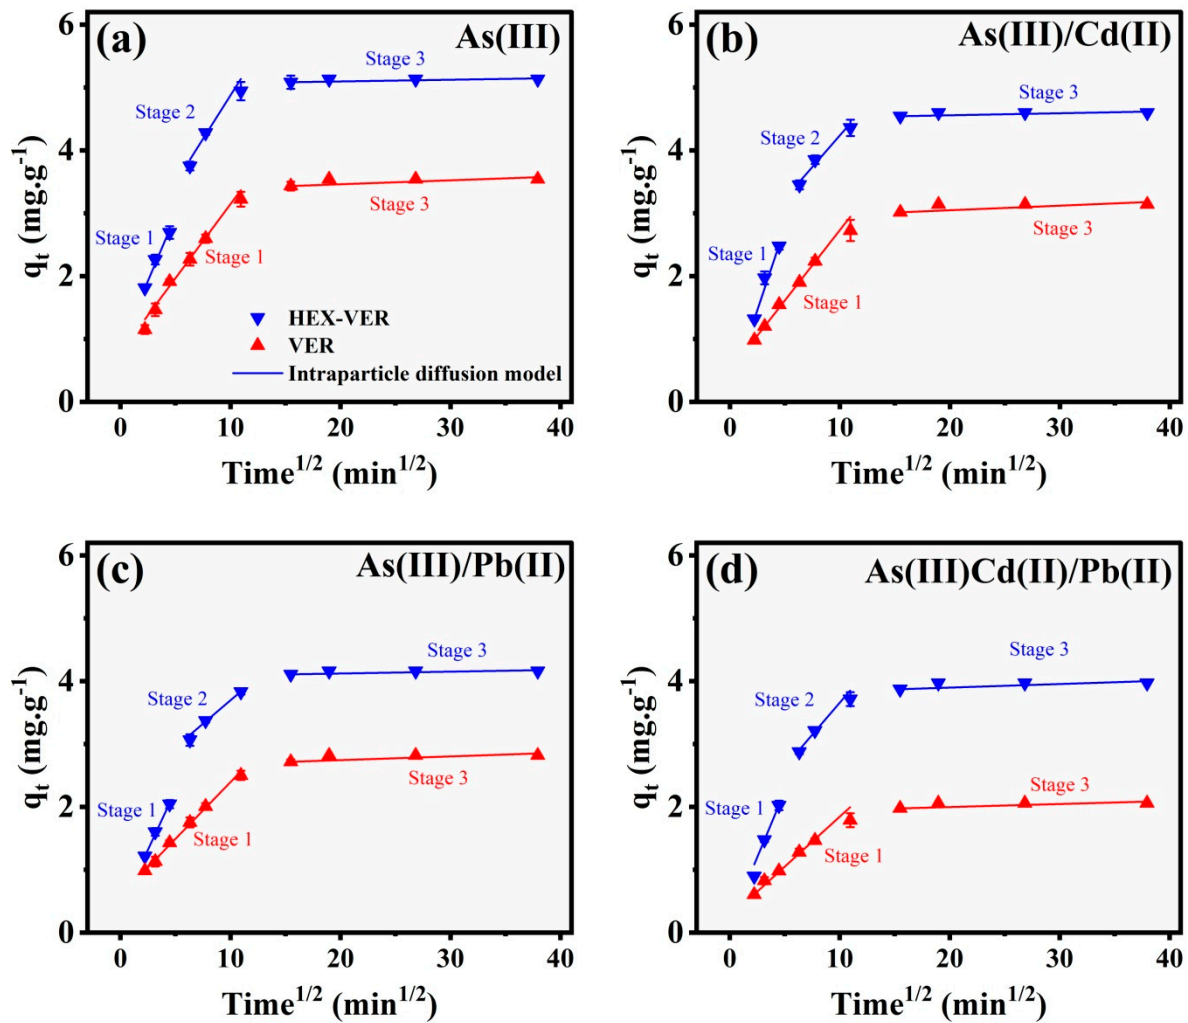

**Figure S8.** Intraparticle diffusion model study of As(III) singular (a), in the presence of Cd(II)(b), in the presence of Pb(II)(c), and in the presence of Cd(II)/Pb(II)(d) on VER and HEX-VER; (As(III) at  $C_i=30 \text{ mg.L}^{-1}$ ; contact time: 1440 min; temperature: 30 °C; pH: 5; adsorbent dosage: 1.0 g.L<sup>-1</sup>)

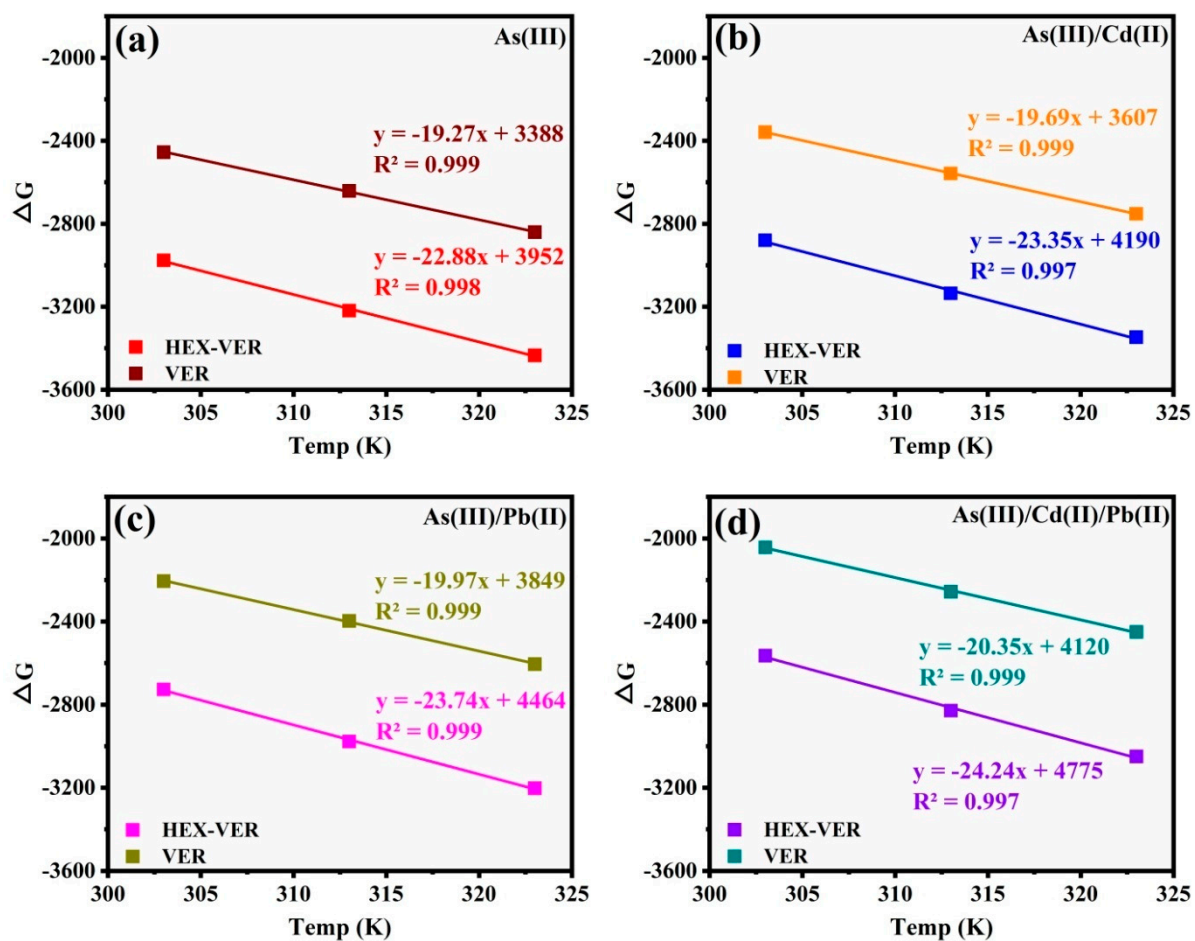

**Figure S9.** Thermodynamic parameters for As(II) singular(a), and As(III) in the presence of Cd(II)(b), Pb(II)(c) and Cd(II)/Pb(II)(d) on VER and HEX-VER; (As(III) at  $C_i=30 \text{ mg.L}^{-1}$ ; contact time: 1440 min; temperature: 303 K to 323 K; pH: 5; adsorbent dosage:  $1.0 \text{ g.L}^{-1}$ )

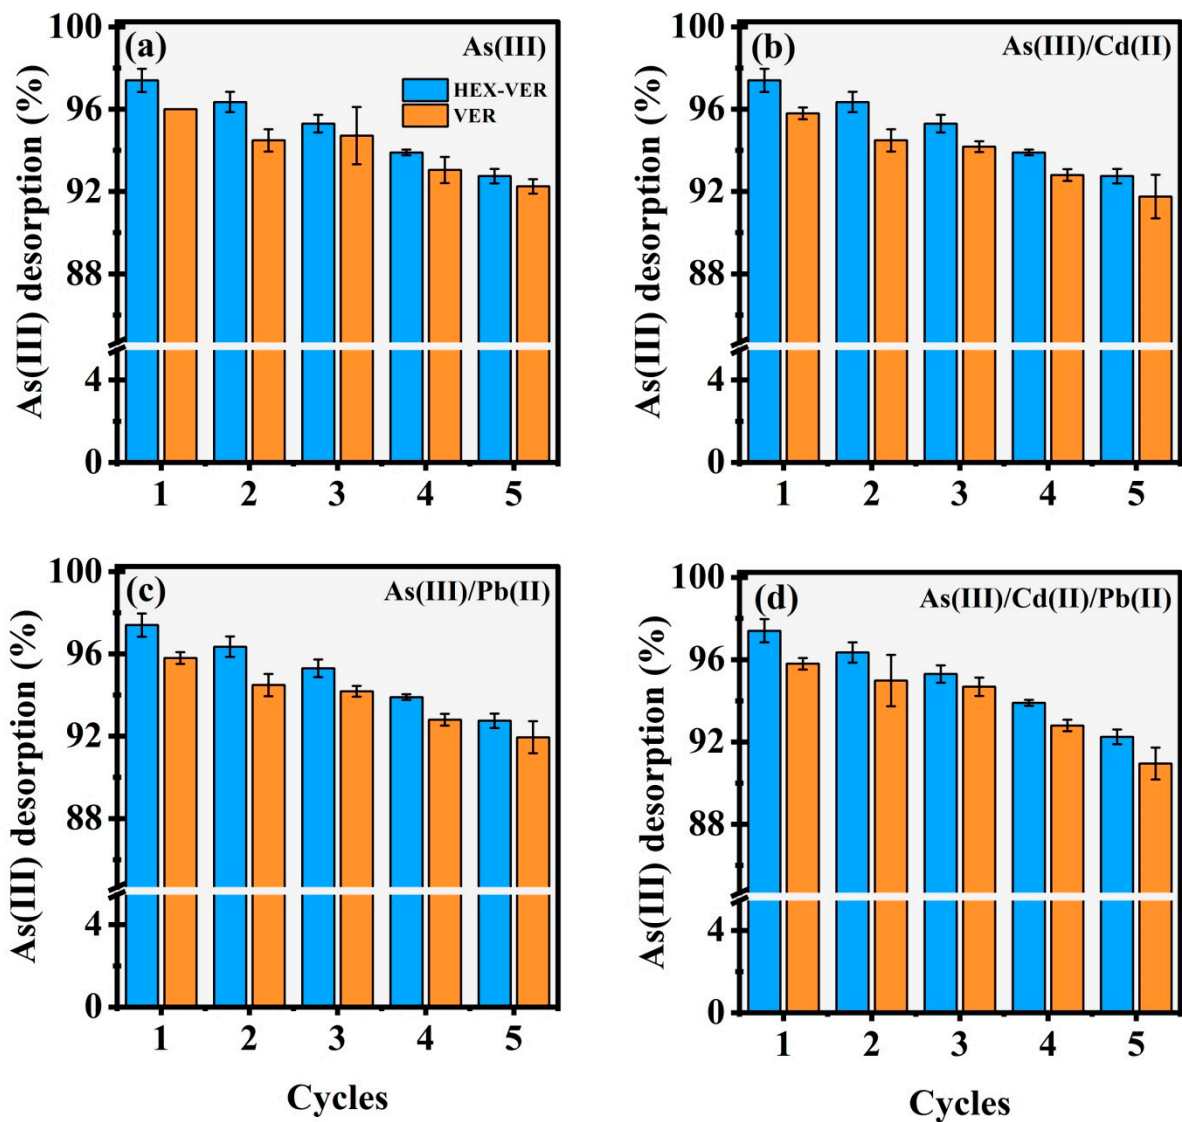

**Figure S10.** Adsorption and desorption studies of As(III) singular (a); in the presence of Cd(II)(b); in the presence of Pb(II)(c) and in the presence of Cd(II)/Pb(II)(d), on VER and HEX-VER; adsorbent dosage:  $1.0 \text{ g.L}^{-1}$ ; contact time: 1440 min; temperature:  $30^\circ\text{C}$ ; desorbent:  $0.1 \text{ M NaOH}$ ; desorption time 240 min.

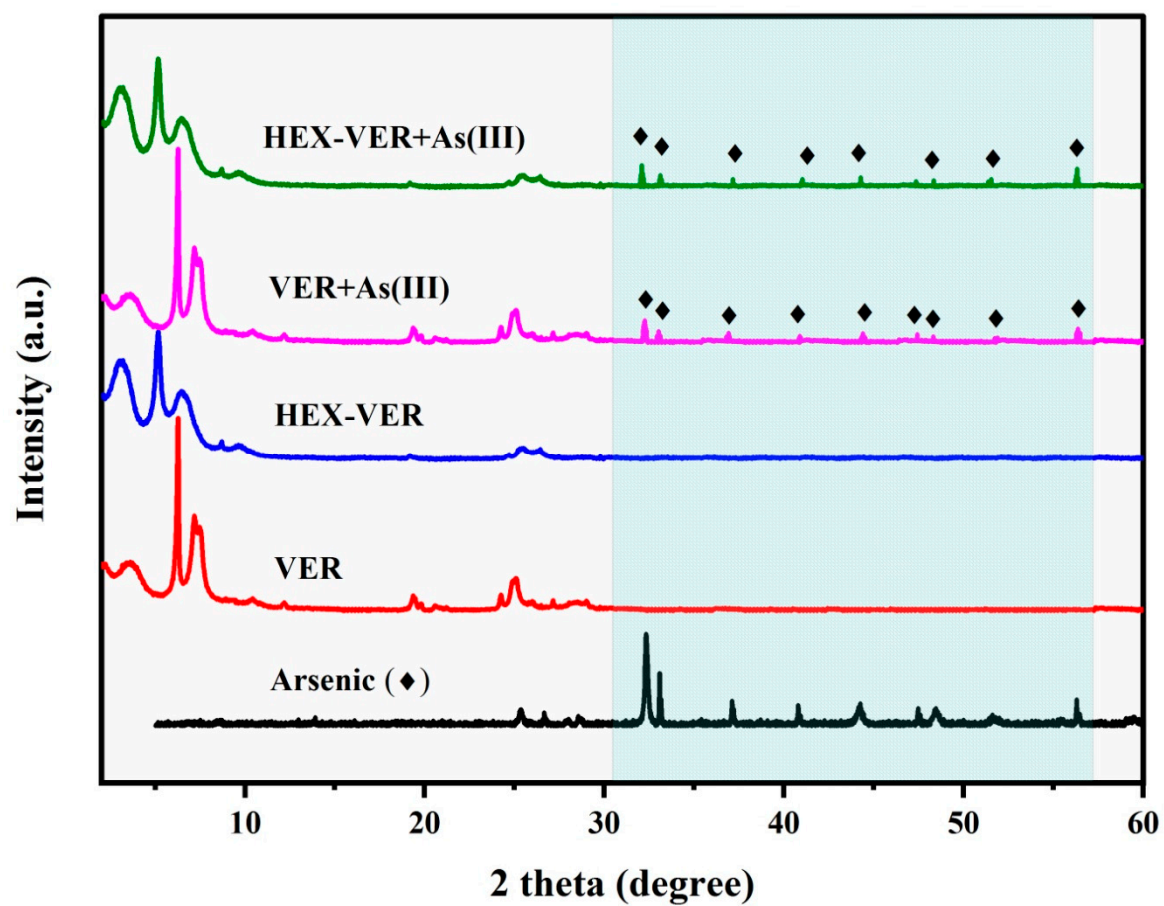

*Figure S11. XRD of VER and HEX-VER before and after the adsorption of As(III).*



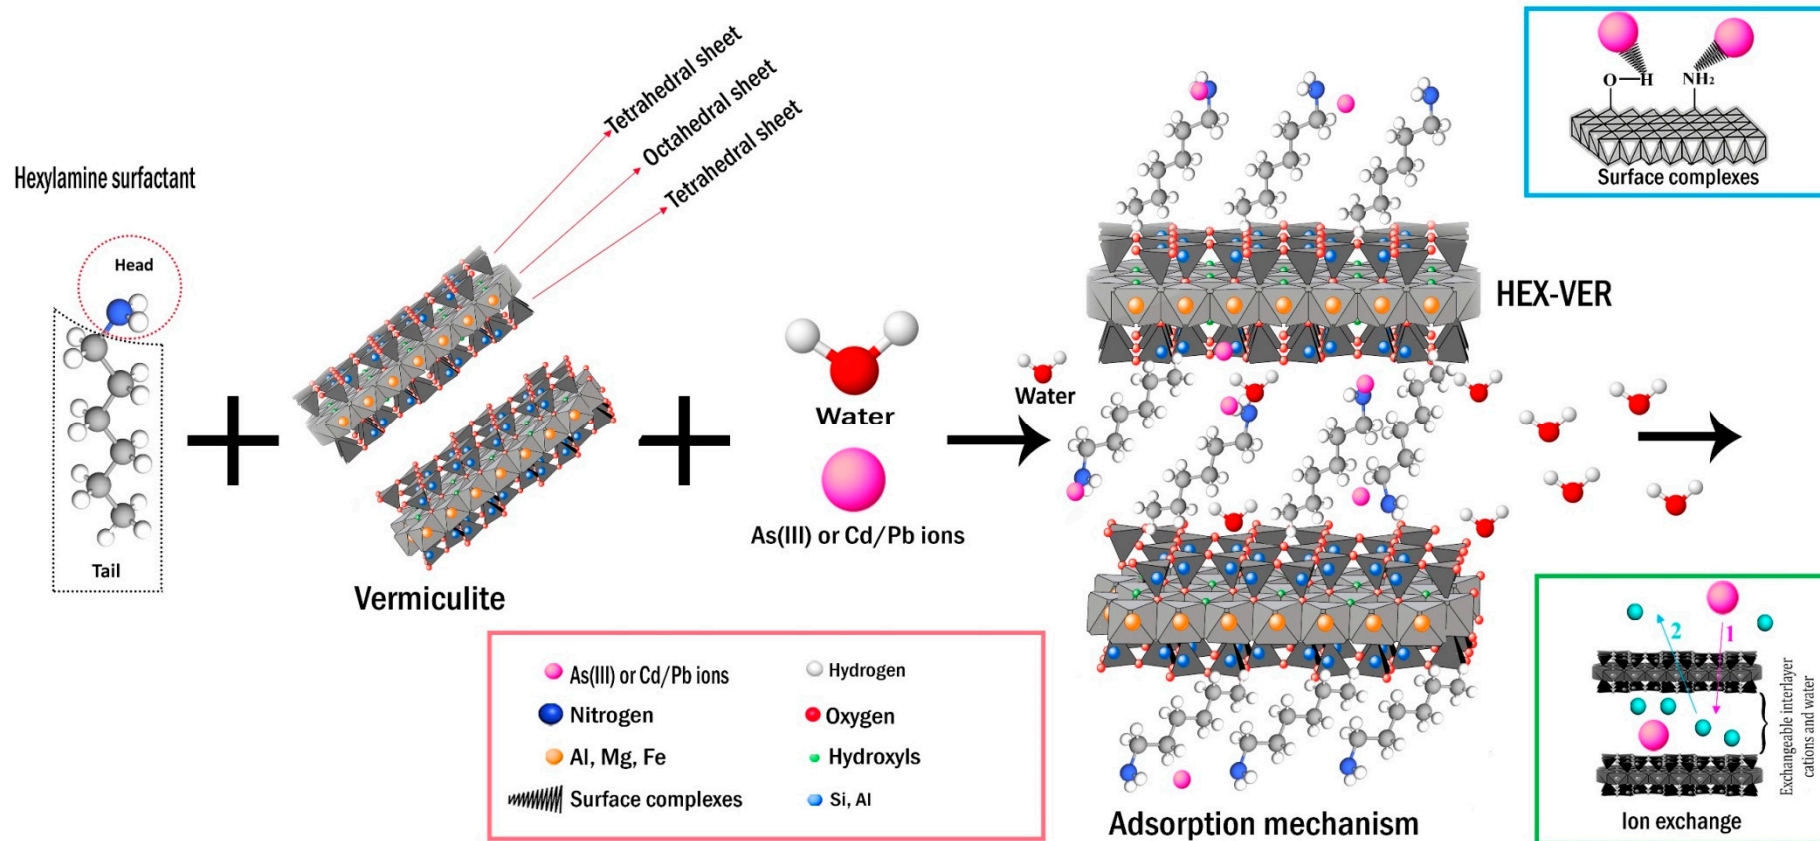

**Figure S12.** Schematic diagram of removal mechanism of As(III) by hexylamine modified vermiculite.

**Table S1.** X-Ray Fluorescence Spectrometer (XRF) analysis of VER and HEX-VER

| Oxides                         | MASS (%)     |              |
|--------------------------------|--------------|--------------|
|                                | VER          | HEX-VER      |
| SiO <sub>2</sub>               | 37.76 ± 0.01 | 36.50 ± 0.01 |
| MgO                            | 20.76 ± 0.01 | 18.14 ± 0.01 |
| Fe <sub>2</sub> O <sub>3</sub> | 8.50 ± 0.01  | 8.66 ± 0.01  |
| Al <sub>2</sub> O <sub>3</sub> | 8.30 ± 0.01  | 8.26 ± 0.01  |
| K <sub>2</sub> O               | 4.38 ± 0.01  | 3.49 ± 0.01  |
| CaO                            | 3.97 ± 0.01  | 1.28 ± 0.01  |
| P <sub>2</sub> O <sub>5</sub>  | 1.43 ± 0.01  | 0.89 ± 0.01  |
| TiO <sub>2</sub>               | 0.99 ± 0.01  | 1.10 ± 0.01  |
| Cr <sub>2</sub> O <sub>3</sub> | 0.10 ± 0.01  | 0.10 ± 0.01  |
| MnO                            | 0.07 ± 0.01  | 0.06 ± 0.01  |
| NiO                            | 0.07 ± 0.01  | 0.06 ± 0.01  |
| L.O.I.                         | 13.62 ± 0.01 | 21.46 ± 0.01 |

L.O.I.= Loss on ignition

**Table S2.** Detailed information of all involved formulas of kinetics, isotherm and thermodynamic models.

| Type                | Model                    | Equation                                                                                  | Parameters                                                                                                                                                                                                                                                                                                                          |
|---------------------|--------------------------|-------------------------------------------------------------------------------------------|-------------------------------------------------------------------------------------------------------------------------------------------------------------------------------------------------------------------------------------------------------------------------------------------------------------------------------------|
| Formulas            | Removal efficiency       | $R (\%) = \frac{C_0 - C_t}{C_0} \times 100$                                               | $C_0$ (mg·L <sup>-1</sup> ): initial As(III) concentration;<br>$C_t$ (mg·L <sup>-1</sup> ): residual As(III) concentration at $t$ (min).                                                                                                                                                                                            |
|                     | Adsorption capacity      | $q_t = \frac{(C_0 - C_t)V}{m}$                                                            | $V$ (L): reaction solution volume;<br>$m$ (g): the mass of the adsorbent.                                                                                                                                                                                                                                                           |
| Isotherm model      | Langmuir                 | $\frac{C_e}{q_e} = \frac{1}{q_m K_L} + \frac{C_e}{q_m}$<br>$R_L = \frac{1}{1 + K_L C_0}$  | $q_e$ (mg·g <sup>-1</sup> ): equilibrium adsorption capacity; $C_e$ (mg·L <sup>-1</sup> ): solution equilibrium concentration; $q_m$ (mg·g <sup>-1</sup> ): maximum adsorption capacity; $K_L$ (L·mg <sup>-1</sup> ): Langmuir constant; $R_L$ : the separation factor. (Langmuir, 1916)                                            |
|                     | Freundlich               | $q_e = K_F C_e^{1/n}$<br>$\ln q_e = \frac{1}{n} \ln C_e + \ln K_F$                        | $K_F$ (L·mg <sup>-1</sup> ) and $n$ : the Freundlich constants, which indicate the adsorption capacity and intensity. (Freundlich)                                                                                                                                                                                                  |
| Kinetics model      | pseudo-first order       | $\ln(q_e - q_t) = \ln q_e - k_1 t$                                                        | $q_e$ (mg·g <sup>-1</sup> ): equilibrium adsorption capacity; $q_t$ (mg·g <sup>-1</sup> ): the sorption amount at time $t$ ; $k_1$ (min <sup>-1</sup> ): the adsorption rate constant. (Corbett, 1972)                                                                                                                              |
|                     | pseudo-second order      | $\frac{t}{q_t} = \frac{t}{q_e} + \frac{1}{k_2 q_e^2}$                                     | $k_2$ (g/mg min) : the rate constant determined by the plots of $t/q_t$ versus $t$ . (Ho and McKay, 1999)                                                                                                                                                                                                                           |
|                     | intra-particle diffusion | $q_t = k_i t^{0.5} + c_i$                                                                 | $k_i$ (mg·g <sup>-1</sup> ·min <sup>0.5</sup> ): the rate constant; $c_i$ : the intercept related to the thickness of the boundary layer. (Weber Jr and Morris, 1963)                                                                                                                                                               |
| Thermodynamic model | Gibbs-Helmholtz equation | $\Delta G = -RT \ln K_d$<br>$\Delta G = \Delta H - T \Delta S$<br>$K_d = \frac{q_e}{C_e}$ | $R$ : the gas constant (8.314 J·mol <sup>-1</sup> K <sup>-1</sup> ); $T$ (K): the temperature; $\Delta G$ (kJ·mol <sup>-1</sup> ): the free energy change; $\Delta H$ (kJ·mol <sup>-1</sup> ): the enthalpy change; $\Delta S$ (kJ·Kmol <sup>-1</sup> ): the entropy change; $K_d$ denotes distribution coefficient. (Atkins, 1978) |

**Table S3.** The BET surface areas and pore parameters of the samples ( $S_{\text{BET}}$ , specific surface area by BET;  $D_a$ , average pore diameter;  $V_t$ , total porous volume)

| Parameters                                            | Samples |         |
|-------------------------------------------------------|---------|---------|
|                                                       | VER     | HEX-VER |
| $S_{\text{BET}}$ ( $\text{m}^2 \cdot \text{g}^{-1}$ ) | 11.297  | 4.3225  |
| $D_a$ (nm)                                            | 10.576  | 16.684  |
| BJH Meso $\text{cm}^3 \cdot \text{g}^{-1}$            | 0.0298  | 0.0180  |
| $V_t$ ( $\text{cm}^3 \cdot \text{g}^{-1}$ )           | 0.0306  | 0.0186  |

**Table S4.** *The surface chemical constituents of VER and HEX-VER*

| Elements | VER<br>Mass ratio (wt.%) |         |         | HEX-VER<br>Mass ratio (wt.%) |         |         |
|----------|--------------------------|---------|---------|------------------------------|---------|---------|
|          | Point 1                  | Point 2 | Point 3 | Point 1                      | Point 2 | Point 3 |
| C        | 5.03                     | 5.18    | 6.15    | 14.23                        | 14.28   | 16.74   |
| O        | 43.38                    | 45.56   | 43.43   | 39.38                        | 37.13   | 38.81   |
| Mg       | 13.34                    | 13.16   | 15.17   | 8.64                         | 7.18    | 7.98    |
| Si       | 17.91                    | 17.54   | 16.14   | 14.54                        | 12.87   | 13.18   |
| Al       | 6.07±1                   | 5.84±1  | 5.74±1  | 5.34±1                       | 5.45±1  | 5.88±1  |
| K        | 6.72±1                   | 6.26±1  | 6.65±1  | 6.71±1                       | 5.87±1  | 5.38±1  |
| Ca       | 0.77                     | 0.68    | 0.64    | 0.74                         | 0.59    | 0.63    |
| Ti       | 0.45                     | 0.39    | 0.43    | 0.39                         | 0.37    | 0.41    |
| Fe       | 6.32±1                   | 5.37±1  | 5.64±1  | 5.61±1                       | 4.45±1  | 4.21±1  |

**Table S5.** Isotherm parameters for As(III) adsorption on VER and HEX-VER.

| Pollutant | Adsorbent | System                | Langmuir parameters                 |                                |       | Freundlich parameters |                                                                   |       |
|-----------|-----------|-----------------------|-------------------------------------|--------------------------------|-------|-----------------------|-------------------------------------------------------------------|-------|
|           |           |                       | $q_{\max}$<br>(mg·g <sup>-1</sup> ) | $K_L$<br>(L·mg <sup>-1</sup> ) | $R^2$ | $1/n_F$               | $K_F$<br>(mg·g <sup>1</sup> )(L·mg <sup>-1</sup> ) <sup>1/n</sup> | $R^2$ |
| As(III)   | HEX-VER   | As(III)               | 13.52                               | 0.078                          | 0.983 | 0.271                 | 1.42                                                              | 0.933 |
|           |           | As(III)/Cd(II)        | 12.12                               | 0.080                          | 0.977 | 0.285                 | 1.22                                                              | 0.963 |
|           |           | As(III)/Pb(II)        | 10.97                               | 0.074                          | 0.975 | 0.391                 | 1.55                                                              | 0.952 |
|           |           | As(III)/Cd(II)/Pb(II) | 10.33                               | 0.061                          | 0.987 | 0.349                 | 1.58                                                              | 0.966 |
|           | VER       | As(III)               | 11.89                               | 0.084                          | 0.989 | 0.299                 | 0.83                                                              | 0.982 |
|           |           | As(III)/Cd(II)        | 10.37                               | 0.025                          | 0.963 | 0.295                 | 0.60                                                              | 0.930 |
|           |           | As(III)/Pb(II)        | 9.32                                | 0.062                          | 0.961 | 0.243                 | 0.76                                                              | 0.931 |
|           |           | As(III)/Cd(II)/Pb(II) | 6.12                                | 0.018                          | 0.979 | 0.257                 | 0.43                                                              | 0.966 |



**Table S6.** Kinetic parameters for As(III) adsorption on VER and HEX-VER.

| Pollutant | Adsorbent | System                | $q_e$<br>(experimental)<br>(mg.g <sup>-1</sup> ) | Pseudo first order<br>model   |                                |       | Pseudo second order<br>model                      |                                |       |
|-----------|-----------|-----------------------|--------------------------------------------------|-------------------------------|--------------------------------|-------|---------------------------------------------------|--------------------------------|-------|
|           |           |                       |                                                  | $K_1$<br>(min <sup>-1</sup> ) | $q_c$<br>(mg.g <sup>-1</sup> ) | $R^2$ | $K_2$<br>(g.mg <sup>-1</sup> .min <sup>-1</sup> ) | $q_c$<br>(mg.g <sup>-1</sup> ) | $R^2$ |
| As(III)   | HEX-VER   | As(III)               | 5.13                                             | 5.12                          | 0.045                          | 0.923 | 0.014                                             | 5.13                           | 0.933 |
|           |           | As(III)/Cd(II)        | 4.59                                             | 4.54                          | 0.043                          | 0.968 | 0.025                                             | 4.85                           | 0.963 |
|           |           | As(III)/Pb(II)        | 4.16                                             | 4.10                          | 0.031                          | 0.966 | 0.010                                             | 4.47                           | 0.988 |
|           |           | As(III)/Cd(II)/Pb(II) | 3.97                                             | 3.87                          | 0.031                          | 0.987 | 0.010                                             | 4.21                           | 0.988 |
|           | VER       | As(III)               | 3.54                                             | 3.54                          | 0.036                          | 0.936 | 0.014                                             | 3.64                           | 0.982 |
|           |           | As(III)/Cd(II)        | 3.13                                             | 4.85                          | 0.012                          | 0.991 | 0.013                                             | 3.27                           | 0.994 |
|           |           | As(III)/Pb(II)        | 2.82                                             | 2.66                          | 0.038                          | 0.978 | 0.016                                             | 2.92                           | 0.994 |
|           |           | As(III)/Cd(II)/Pb(II) | 2.06                                             | 1.94                          | 0.038                          | 0.979 | 0.022                                             | 2.13                           | 0.994 |

**Table S7.** Parameters of Intra-particle diffusion model parameters for As(III) adsorption onto VER and HEX-VER.

| Pollutant | Adsorbent | System                | Stage 1           |        |       | Stage 2                 |        |       | Stage 3                         |        |       |
|-----------|-----------|-----------------------|-------------------|--------|-------|-------------------------|--------|-------|---------------------------------|--------|-------|
|           |           |                       | Surface diffusion |        |       | Intraparticle diffusion |        |       | Ultimate adsorption equilibrium |        |       |
|           |           |                       | $K_1$             | $C_1$  | $R^2$ | $K_2$                   | $C_2$  | $R^2$ | $K_3$                           | $C_3$  | $R^2$ |
| As(III)   | HEX-VER   | As(III)               | 0.889             | 0.4133 | 0.995 | 2.099                   | 0.2773 | 0.965 | 5.041                           | 0.0027 | 0.843 |
|           |           | As(III)/Cd(II)        | 0.150             | 0.5239 | 0.996 | 2.227                   | 0.2011 | 0.980 | 4.492                           | 0.0032 | 0.846 |
|           |           | As(III)/Pb(II)        | 0.377             | 0.3767 | 0.998 | 2.204                   | 0.1491 | 0.994 | 4.063                           | 0.0029 | 0.988 |
|           |           | As(III)/Cd(II)/Pb(II) | 0.148             | 0.4196 | 0.999 | 1.618                   | 0.2038 | 0.984 | 3.783                           | 0.0057 | 0.847 |
|           | VER       | As(III)               | 0.786             | 0.2356 | 0.984 | -                       | -      | -     | 3.335                           | 0.0062 | 0.982 |
|           |           | As(III)/Cd(II)        | 0.491             | 0.2239 | 0.998 | -                       | -      | -     | 2.901                           | 0.0072 | 0.847 |
|           |           | As(III)/Pb(II)        | 0.589             | 0.1804 | 0.998 | -                       | -      | -     | 2.626                           | 0.0058 | 0.846 |
|           |           | As(III)/Cd(II)/Pb(II) | 0.254             | 0.1590 | 0.997 | -                       | -      | -     | 1.901                           | 0.0048 | 0.994 |

**Table S8:** Thermodynamic parameters for single and simultaneous As(III) adsorption on VER and HEX-VER.

| Pollutant | Adsorbent | System                | T(K) | $\Delta G$<br>kJ mol <sup>-1</sup> | $\Delta H$<br>kJ mol <sup>-1</sup> | $\Delta S$<br>J mol <sup>-1</sup> K <sup>-1</sup> |
|-----------|-----------|-----------------------|------|------------------------------------|------------------------------------|---------------------------------------------------|
| As(III)   | VER       | As(III)               | 303  | -1.68003                           | 7.887                              | 0.03157434                                        |
|           |           |                       | 313  | -1.95458                           |                                    |                                                   |
|           |           |                       | 323  | -2.31068                           |                                    |                                                   |
|           |           | As(III)/Cd(II)        | 303  | -1.47372                           | 7.448                              | 0.02944461                                        |
|           |           |                       | 313  | -1.77776                           |                                    |                                                   |
|           |           |                       | 323  | -2.06282                           |                                    |                                                   |
|           |           | As(III)/Pb(II)        | 303  | -5.12649                           | 16.582                             | 0.07164519                                        |
|           |           |                       | 313  | -5.73111                           |                                    |                                                   |
|           |           |                       | 323  | -6.55699                           |                                    |                                                   |
|           |           | As(III)/Cd(II)/Pb(II) | 303  | -4.94107                           | 15.432                             | 0.06723784                                        |
|           |           |                       | 313  | -5.58658                           |                                    |                                                   |
|           |           |                       | 323  | -6.28521                           |                                    |                                                   |
|           | HEX-VER   | As(III)               | 303  | -5.47350                           | 13.604                             | 0.06296204                                        |
|           |           |                       | 313  | -6.16903                           |                                    |                                                   |
|           |           |                       | 323  | -6.73415                           |                                    |                                                   |
|           |           | As(III)/Cd(II)        | 303  | -5.31851                           | 11.886                             | 0.05678055                                        |
|           |           |                       | 313  | -5.80497                           |                                    |                                                   |
|           |           |                       | 323  | -6.45238                           |                                    |                                                   |
|           |           | As(III)/Pb(II)        | 303  | -9.06573                           | 23.741                             | 0.108273                                          |
|           |           |                       | 313  | -10.33750                          |                                    |                                                   |
|           |           |                       | 323  | -11.23530                          |                                    |                                                   |
|           |           | As(III)/Cd(II)/Pb(II) | 303  | -8.95409                           | 21.278                             | 0.09977587                                        |
|           |           |                       | 313  | -9.99450                           |                                    |                                                   |
|           |           |                       | 323  | -10.95050                          |                                    |                                                   |

**Table S9.** Comparison of maximum adsorption capacities ( $Q_{\max}$ ) of As(III) by different materials

| Adsorbent                                     | Initial pH | $Q_{\max}$ As(III)<br>( $\text{mg}\cdot\text{g}^{-1}$ ) | References                  |
|-----------------------------------------------|------------|---------------------------------------------------------|-----------------------------|
| Fe-Mn binary oxide                            | pH 7.0     | 114                                                     | (Zhang et al., 2012)        |
| Zn-Fe mixed metal oxides                      | pH 7.0     | 36                                                      | (Di et al., 2017)           |
| Cu doped $\text{Fe}_3\text{O}_4$              | pH 5.0     | 38.0                                                    | (Wang et al., 2015)         |
| CMZF                                          | pH 6.0     | 90.197                                                  | (Liu et al., 2019)          |
| 3-aminopyrazole functionalized graphene oxide | pH 8.3     | 131.57                                                  | (Alimohammady et al., 2017) |
| Zeolite-supported zero-valent iron            | pH 6.0     | 18.73                                                   | (Li et al., 2018)           |
| Calcium based magnetic biochar                | pH 5.2     | 6.34                                                    | (Wu et al., 2020)           |
| Iron/calcium impregnated carbon (GL200)       | pH 7.0     | 3.385                                                   | (Gong et al., 2020)         |
| <b>HEX-VER</b>                                | pH 5.0     | <b>13.52</b>                                            | <b>This work</b>            |

**Table S10.** Water quality index of Pearl River (ZhuJiang, Guangdong, China) water samples used in this study

| Adsorbent     | Water-quality Index                           | Values |
|---------------|-----------------------------------------------|--------|
| Anions        | $\text{NO}_3^- \text{ (mg.L}^{-1}\text{)}$    | 3.41   |
|               | $\text{SO}_4^{2-} \text{ (mg.L}^{-1}\text{)}$ | 9.67   |
|               | $\text{PO}_4^{3-} \text{ (mg.L}^{-1}\text{)}$ | 0.28   |
| Cations       | $\text{Ca}^{2+} \text{ (mg.L}^{-1}\text{)}$   | 17.64  |
|               | $\text{Mg}^{2+} \text{ (mg.L}^{-1}\text{)}$   | 7.1    |
|               | $\text{Zn}^{2+} \text{ (mg.L}^{-1}\text{)}$   | 0.54   |
| Spiked metals | $\text{As(III) (}\mu\text{g.L}^{-1}\text{)}$  | 2000   |
|               | $\text{Cd(II) (}\mu\text{g.L}^{-1}\text{)}$   | 4000   |
|               | $\text{Pb(II) (}\mu\text{g.L}^{-1}\text{)}$   | 4000   |
| Other         | pH                                            | 7.26   |
|               | $\text{TOC (mg.L}^{-1}\text{)}$               | 5.64   |

## References

- Ahmed, Z, Wu, P, Jiang, L, Liu, J, Ye, Q, Yang, Q, Zhu, N, 2020. Enhanced simultaneous adsorption of Cd(II) and Pb(II) on octylamine functionalized vermiculite. *Colloids and Surfaces A: Physicochemical and Engineering Aspects* 604:125285.
- Alimohammady, M, Jahangiri, M, Kiani, F, Tahermansouri, H, 2017. Highly efficient simultaneous adsorption of Cd(ii), Hg(ii) and As(iii) ions from aqueous solutions by modification of graphene oxide with 3-aminopyrazole: central composite design optimization. *New Journal of Chemistry* 41:8905-8919.
- Atkins, P W, 1978. *Physical chemistry*. Oxford University Press: Oxford.
- Corbett, J F J J o C E, 1972. Pseudo first-order kinetics. 49:663.
- Di, G, Zhu, Z, Zhang, H, Zhu, J, Lu, H, Zhang, W, Qiu, Y, Zhu, L, Küppers, S, 2017. Simultaneous removal of several pharmaceuticals and arsenic on Zn-Fe mixed metal oxides: Combination of photocatalysis and adsorption. *Chemical Engineering Journal* 328:141-151.
- Freundlich, H J J o P, F. 1906. Over the adsorption in solution. 57:385.
- Gong, X-J, Li, Y-S, Dong, Y-Q, Li, W-G, 2020. Arsenic adsorption by innovative iron/calcium in-situ-impregnated mesoporous activated carbons from low-temperature water and effects of the presence of humic acids. *Chemosphere* 250:126275.
- Ho, Y-S, McKay, G J P b, 1999. Pseudo-second order model for sorption processes. 34:451-465.
- Langmuir, I, 1916. THE CONSTITUTION AND FUNDAMENTAL PROPERTIES OF SOLIDS AND LIQUIDS. PART I. SOLIDS. *Journal of the American Chemical Society* 38:2221-2295.
- Li, Z, Wang, L, Meng, J, Liu, X, Xu, J, Wang, F, Brookes, P, 2018. Zeolite-supported nanoscale zero-valent iron: New findings on simultaneous adsorption of Cd(II), Pb(II), and As(III) in aqueous solution and soil. *Journal of Hazardous Materials* 344:1-11.
- Liu, J, Wu, P, Li, S, Chen, M, Cai, W, Zou, D, Zhu, N, Dang, Z, 2019. Synergistic deep removal of As(III) and Cd(II) by a calcined multifunctional MgZnFe-CO<sub>3</sub> layered double hydroxide: Photooxidation, precipitation and adsorption. *Chemosphere* 225:115-125.
- Msadok, I, Hamdi, N, Gammoudi, S, Rodríguez, M A, Srasra, E, 2019. Effect of cationic surfactant HDPy<sup>+</sup> on the acidity and hydrophilicity of Tunisian clay. *Materials Chemistry and Physics* 225:279-283.
- Mular, A, Roberts, R, 1966. A simplified method to determine isoelectric points of oxides. *Canadian Mining and Metallurgical Bulletin* 59:1329-&.
- Schroth, B K, Sposito, G, 1997. Surface charge properties of kaolinite. *Clays and Clay Minerals* 45:85-91.
- Wang, T, Yang, W, Song, T, Li, C, Zhang, L, Wang, H, Chai, L, 2015. Cu doped Fe<sub>3</sub>O<sub>4</sub> magnetic adsorbent for arsenic: synthesis, property, and sorption application. *RSC Advances* 5:50011-50018.
- Weber Jr, W J, Morris, J C J J o t s e d, 1963. Kinetics of adsorption on carbon from solution. 89:31-59.
- Wu, J, Li, Z, Huang, D, Liu, X, Tang, C, Parikh, S J, Xu, J, 2020. A novel calcium-based magnetic biochar is effective in stabilization of arsenic and cadmium co-contamination in aerobic soils. *Journal of Hazardous Materials* 387:122010.
- Zhang, G, Liu, H, Qu, J, Jefferson, W, 2012. Arsenate uptake and arsenite simultaneous sorption and oxidation by Fe–Mn binary oxides: Influence of Mn/Fe ratio, pH, Ca<sup>2+</sup>, and humic acid. *Journal of Colloid and Interface Science* 366:141-146.
